# Supplementary material for: Innate Sensing of HIV-1 Assembly by Tetherin Induces NFκB-Dependent Proinflammatory Responses
Source: Cell Host Microbe. 2012 Nov 15;12(5):633–44. doi: 10.1016/j.chom.2012.10.007 (PMC3556742; doi:10.1016/j.chom.2012.10.007)
Supplement: Document S1. Figure S1, Figure S2, Figure S3, Figure S4, Figure S5 [file mmc1.pdf]

## **Supplemental Information**

### **Innate Sensing of HIV-1 Assembly by Tetherin Induces NF $\kappa$ B-Dependent Proinflammatory Responses**

Rui Pedro Galão, Anna Le Tortorec, Suzanne Pickering,  
Tonya Kueck, and Stuart J.D. Neil

#### **Supplementary Figure Inventory**

**Figure S1:** Control Panels demonstrating parallel virus release from experiments in **Figure 1**.

**Figure S2:** Controls in cell lines and primary cells to demonstrate the potential source of IFN responses observed in **Figure 2** and the specificity of shRNA constructs.

**Figure S3** Further virological and signaling phenotypes of tetherin mutants described in **Figure 3**

**Figure S4:** Interactions of some of the tetherins from **Figures 5** with TRAF6

**Figure S5:** Virological phenotypes, expression levels and TRAF6 interactions of primate tetherins and chimeric proteins from **Figure 6**.

## Supplementary Figures

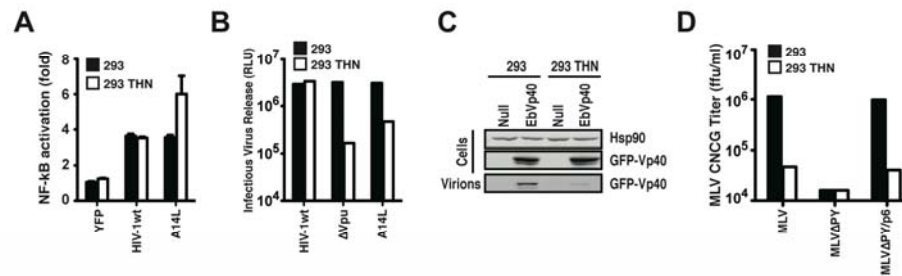

**Figure S1, related to Figure 1: Restriction of viral particle release in 293THN cells. (A)** Transfection of an HIV-1 Vpu-A14L provirus enhanced NF- $\kappa$ B reporter gene activation in 293THN cells. Data are represented as mean  $\pm$  SEM of 3 independent experiments **(B)** Parallel infectious virus release from **(A)** and Figure 1D on HeLa-TZM indicator cells. **(C)** Ebola virus-like particles released from 293 and 293THN cells from Figure 1E were analyzed by western blotting of cell lysates and pelleted supernatants. **(D)** MLV infectious virus release by titration of supernatants from Figure 1G on 293T and analyzed by flow cytometry 48h later.

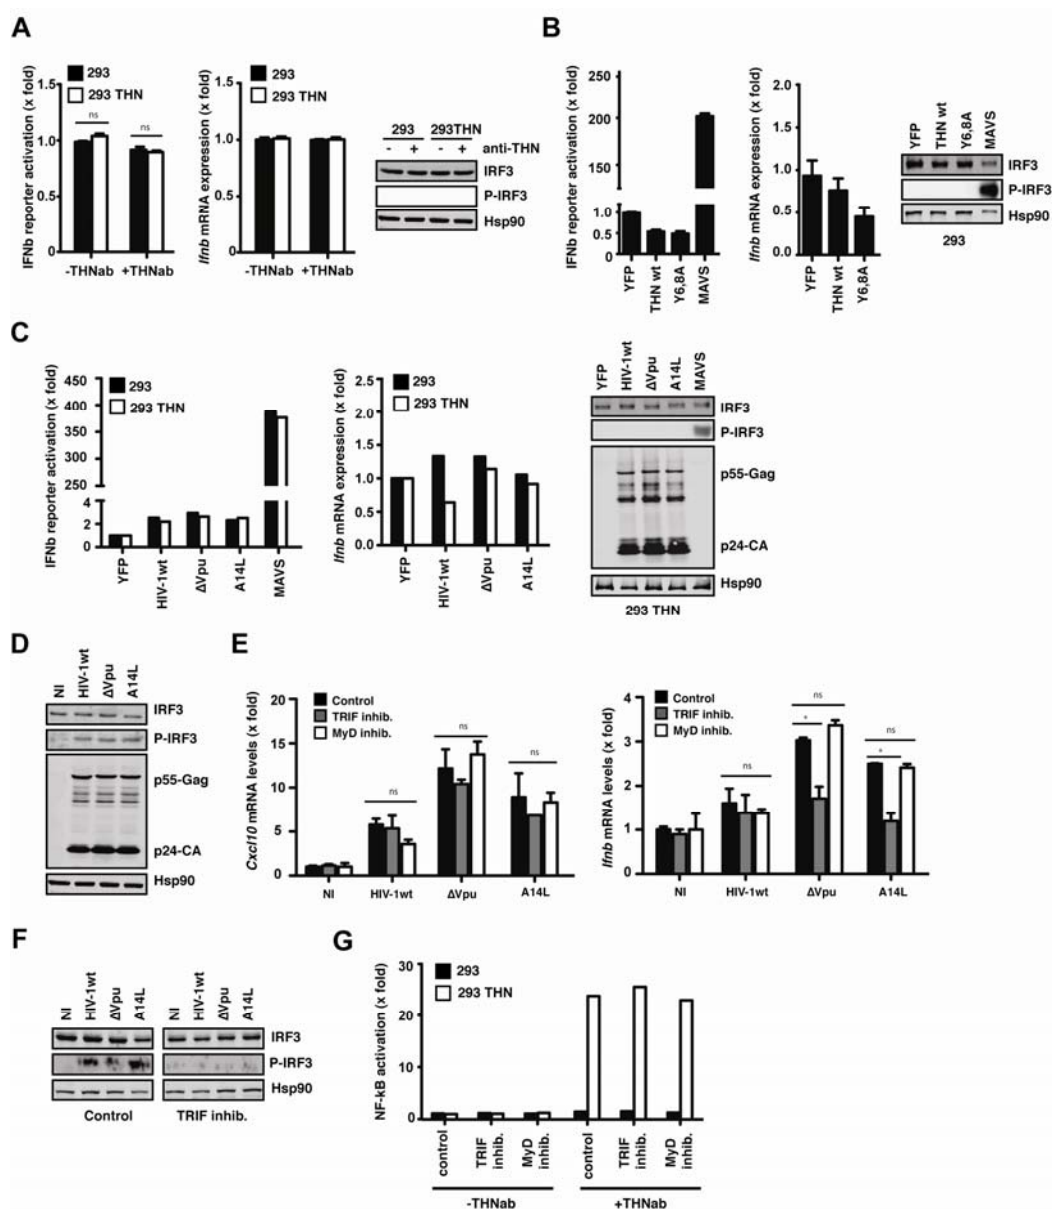

**Figure S2, related to Figure 2: Tetherin does not directly activate IFN $\beta$  expression and IRF3 phosphorylation, but does so indirectly through a TRIF-dependent mechanism in infected T cells.** IFN $\beta$ -luciferase reporter activation (left panels), induction of IFN $\beta$  mRNA (central panels) or phosphorylation of IRF3 (right panels) are not observed following crosslinking with a rabbit anti-tetherin antibody (**A**), tetherin overexpression (**B**) or Vpu(-)

HIV-1 assembly **(C)**. **(D)** Purified CD4<sup>+</sup> T cells were infected with the indicated virus at an MOI of 5. 48h later IRF-3 phosphorylation and viral infection was analyzed by western blot of cell lysates. **(E)** Infected CD4<sup>+</sup> T cells were cultured in the presence of 40μM of control, TRIF and MyD88 inhibitory peptides. Total RNA from 3 biological replicates of parallel cultures were analyzed for *Cxcl10*, and *Ifnb* mRNA levels relative to *Gapdh* by qRT-PCR. Fold changes relative to non-infected cells treated with control peptide. \* P>0.05, \*\* P>0.01 and \*\*\* P>0.001 as determined by two-tailed ttest. **(F)** Activation state of IRF3 in cells cultured in the presence of TRIF inhibitory peptides was assessed by western blotting cell lysates from (E) . **(G)** Activation of NFκB signaling by anti-tetherin antibody crosslink in 293THN cells is not affected by TRIF or MyD88 inhibitory peptides. **(H)** CD4<sup>+</sup> T cells were transduced with lentiviral vectors encoding shRNAs against GFP (shcontrol) or tetherin (sh-THN) and infected with indicated virus at MOI 5 as in Figure 2E. Cell surface staining for endogenous tetherin was analyzed by flow cytometry 48h post-transduction. The solid peak represents the binding of the isotype control and the lines represent tetherin levels in non-treated cells (NT, dotted lines) or transduced cells (solid lines). **(I)** Parallel infectious virus release from **(H)** on HeLa-TZM indicator cells. All error bars represent means +/- SEM of 3 independent experiments.

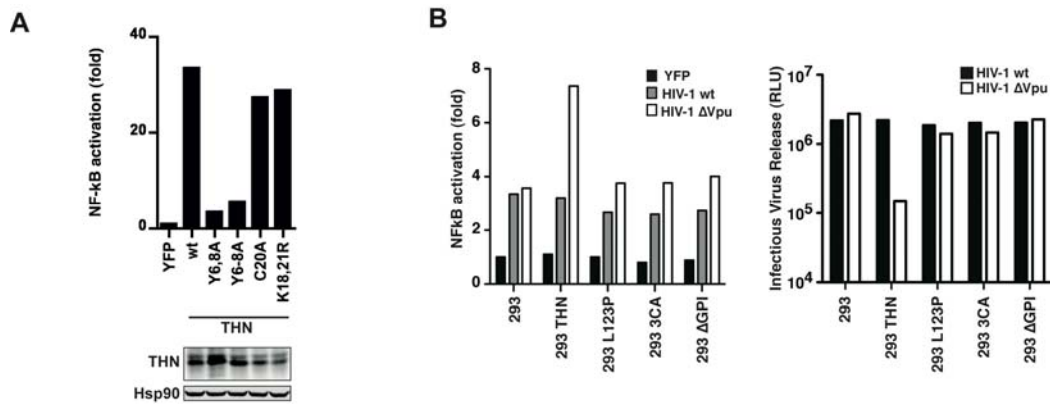

**Figure S3, related to Figure 3: NF-kB reporter gene activities and antiviral function of tetherin mutants. (A)** NF-kB reporter gene activities of tyrosine, cysteine and membrane proximal ubiquitin-accepting-lysine residue mutant tetherins determined by transient transfection as in Figure 3A. **(B)** NF-kB reporter gene activity in 293 cells expressing the indicated tetherin extracellular mutant with wildtype or Vpu(-) provirus as in Figure 3B, and parallel infectious virus release determined on HeLa-TZM cells (right panel).

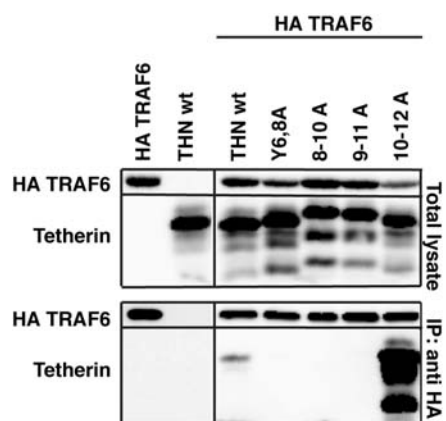

**Figure S4, related to Figure 5: Co-IP of further tetherin mutants with TRAF6.** Co-immunoprecipitation of tetherin, tetherin cytoplasmic tail mutants with HA-TRAF6 from transiently transfected 293 cells as in Figure 5C.

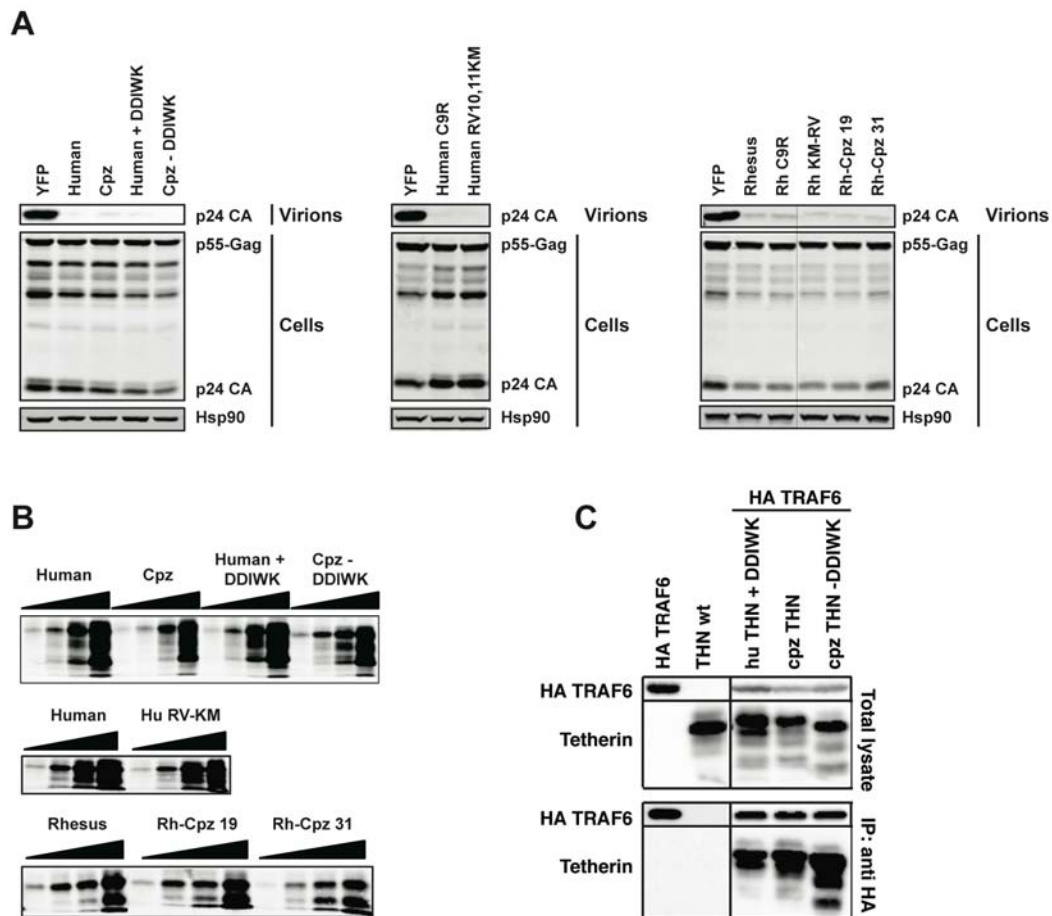

**Figure S5, related to Figure 6: Antiviral function of species-specific tetherin mutants.** Tetherins from Figure 6 were tested for their ability to restrict Vpu(-) virus release (A) and protein expression (B). (C) Chimpanzee and human tetherins with or without DDIWK motif were assessed for their ability to be co-precipitated with HA-TRAF6. Control blot of single transfectants reproduced from Figure S4.
